# Supplementary material for: Identification of Wolbachia-Responsive miRNAs in the Small Brown Planthopper, Laodelphax striatellus
Source: Front Physiol. 2019 Jul 24;10:928. doi: 10.3389/fphys.2019.00928 (PMC6668040; doi:10.3389/fphys.2019.00928)
Supplement: TABLE S5 — Predicted target genes that may be reverse regulated by differentially expressed miRNAs in the female comparison. [file Table_5.xlsx]

## Sheet: S02_vs_S04.annotation
miRNA	FDR	Pvalue	FC	regulated	Target description
lst-miR-n4-3p	0	0	-30.2761	down	Diacylglycerol kinase epsilon [Zootermopsis nevadensis]
	0	0	-30.2761	down	PREDICTED: ATP-binding cassette sub-family D member 1 [Acyrthosiphon pisum]
	0	0	-30.2761	down	target of rapamycin [Nilaparvata lugens]
	0	0	-30.2761	down	hypothetical protein TcasGA2_TC002592 [Tribolium castaneum]
	0	0	-30.2761	down	PREDICTED: cactin [Diaphorina citri]
	0	0	-30.2761	down	PREDICTED: uncharacterized protein LOC105204399, partial [Solenopsis invicta]
	0	0	-30.2761	down	hypothetical protein X777_04987 [Cerapachys biroi]
	0	0	-30.2761	down	PREDICTED: serine/threonine-protein kinase N isoform X3 [Harpegnathos saltator]
	0	0	-30.2761	down	PREDICTED: tubby-related protein 4 [Tribolium castaneum]
	0	0	-30.2761	down	Acyl-CoA-binding domain-containing protein [Cerapachys biroi]
	0	0	-30.2761	down	Guanine nucleotide exchange factor DBS, partial [Zootermopsis nevadensis]
	0	0	-30.2761	down	short-chain dehydrogenase/reductase SDR [Capsaspora owczarzaki ATCC 30864]
	0	0	-30.2761	down	PREDICTED: sialidase [Musca domestica]
	0	0	-30.2761	down	predicted protein [Naegleria gruberi]
	0	0	-30.2761	down	hypothetical protein L798_04327 [Zootermopsis nevadensis]
	0	0	-30.2761	down	N-chimaerin [Zootermopsis nevadensis]
	0	0	-30.2761	down	--
	0	0	-30.2761	down	hypothetical protein RFI_15605 [Reticulomyxa filosa]
	0	0	-30.2761	down	ATPase/histidine kinase/DNA gyrase B/HSP90 domain protein [Acanthamoeba castellanii str. Neff]
	0	0	-30.2761	down	PREDICTED: glutamine--fructose-6-phosphate aminotransferase [isomerizing] 2 isoform X1 [Tribolium castaneum]
	0	0	-30.2761	down	predicted protein [Nematostella vectensis]
lst-miR-n80-3p	0	0	-29.2317	down	Glycoprotein-N-acetylgalactosamine 3-beta-galactosyltransferase 1 [Zootermopsis nevadensis]
	0	0	-29.2317	down	--
	0	0	-29.2317	down	--
	0	0	-29.2317	down	--
	0	0	-29.2317	down	rfx transcription factor [Culex quinquefasciatus]
	0	0	-29.2317	down	PREDICTED: protein dead ringer isoform X2 [Tribolium castaneum]
	0	0	-29.2317	down	--
	0	0	-29.2317	down	dnaj protein; dnaj homolog subfamily b member lik e; dnaj homolog subfamily b member [Trichuris trichiura]
	0	0	-29.2317	down	protein phosphatase 2c [Capsaspora owczarzaki ATCC 30864]
	0	0	-29.2317	down	DNA polymerase eta [Trypanosoma cruzi strain CL Brener]
lst-miR-n6-5p	0.000474419	0.000136	-28.2317	down	PREDICTED: glutamate dehydrogenase, mitochondrial [Acyrthosiphon pisum]
	0.000474419	0.000136	-28.2317	down	--
	0.000474419	0.000136	-28.2317	down	--
	0.000474419	0.000136	-28.2317	down	PREDICTED: polycomb protein Pcl-like [Megachile rotundata]
	0.000474419	0.000136	-28.2317	down	--
lst-miR-n52-5p	0	0	-9.23235	down	WD repeat-containing protein 61 [Zootermopsis nevadensis]
	0	0	-9.23235	down	PREDICTED: hexaprenyldihydroxybenzoate methyltransferase, mitochondrial [Microplitis demolitor]
	0	0	-9.23235	down	PREDICTED: protein still life, isoform SIF type 1 [Tribolium castaneum]
	0	0	-9.23235	down	WD repeat-containing protein 3 [Zootermopsis nevadensis]
	0	0	-9.23235	down	Dual 3&apos;,5&apos;-cyclic-AMP and -GMP phosphodiesterase 11 [Zootermopsis nevadensis]
	0	0	-9.23235	down	F-box-like/WD repeat-containing protein TBL1XR1 [Zootermopsis nevadensis]
	0	0	-9.23235	down	Arginine-glutamic acid dipeptide repeats protein [Zootermopsis nevadensis]
	0	0	-9.23235	down	Double-stranded RNA-specific editase 1 [Zootermopsis nevadensis]
	0	0	-9.23235	down	Transitional endoplasmic reticulum ATPase TER94 [Zootermopsis nevadensis]
	0	0	-9.23235	down	Protein tweety [Zootermopsis nevadensis]
	0	0	-9.23235	down	PREDICTED: LOW QUALITY PROTEIN: Down syndrome cell adhesion molecule-like protein Dscam2 [Acromyrmex echinatior]
	0	0	-9.23235	down	PREDICTED: serine/threonine-protein phosphatase 2B catalytic subunit 2-like isoform X4 [Nasonia vitripennis]
	0	0	-9.23235	down	Tyrosine-protein kinase Src42A [Zootermopsis nevadensis]
	0	0	-9.23235	down	Peptidyl-prolyl cis-trans isomerase-like protein [Cerapachys biroi]
	0	0	-9.23235	down	Type I inositol-3,4-bisphosphate 4-phosphatase [Zootermopsis nevadensis]
	0	0	-9.23235	down	PREDICTED: transcription elongation regulator 1 [Acyrthosiphon pisum]
	0	0	-9.23235	down	hexamerin 1 [Perla marginata]
	0	0	-9.23235	down	hypothetical protein L798_04009, partial [Zootermopsis nevadensis]
	0	0	-9.23235	down	hunchback [Oncopeltus fasciatus]
	0	0	-9.23235	down	phosphoesterase 20, partial [Laodelphax striatella]
	0	0	-9.23235	down	PREDICTED: tyrosine-protein kinase Drl-like [Bombus terrestris]
	0	0	-9.23235	down	PREDICTED: diacylglycerol kinase eta [Acyrthosiphon pisum]
	0	0	-9.23235	down	E3 ubiquitin-protein ligase CBL-B, partial [Zootermopsis nevadensis]
	0	0	-9.23235	down	putative C-5 sterol desaturase [Zootermopsis nevadensis]
	0	0	-9.23235	down	hypothetical protein TcasGA2_TC016048 [Tribolium castaneum]
	0	0	-9.23235	down	PREDICTED: uncharacterized protein LOC100888631 [Strongylocentrotus purpuratus]
	0	0	-9.23235	down	transmembrane protein, putative [Acanthamoeba castellanii str. Neff]
	0	0	-9.23235	down	hypothetical protein BRAFLDRAFT_57046 [Branchiostoma floridae]
	0	0	-9.23235	down	--
	0	0	-9.23235	down	hypothetical protein BRAFLDRAFT_265962 [Branchiostoma floridae]
	0	0	-9.23235	down	--
	0	0	-9.23235	down	expressed hypothetical protein [Trichoplax adhaerens]
	0	0	-9.23235	down	Transforming growth factor-beta receptor-associated protein 1, partial [Stegodyphus mimosarum]
	0	0	-9.23235	down	PREDICTED: nuclear migration protein nudC-like [Amphimedon queenslandica]
	0	0	-9.23235	down	--
	0	0	-9.23235	down	hypothetical protein BRAFLDRAFT_59448 [Branchiostoma floridae]
	0	0	-9.23235	down	alpha/beta hydrolase fold domain containing protein [Acanthamoeba castellanii str. Neff]
	0	0	-9.23235	down	--
	0	0	-9.23235	down	Rho guanine nucleotide exchange factor 7 [Zootermopsis nevadensis]
	0	0	-9.23235	down	tRNA-specific adenosine deaminase subunit TAD3 [Entamoeba dispar SAW760]
	0	0	-9.23235	down	--
	0	0	-9.23235	down	--
	0	0	-9.23235	down	hypothetical protein CAOG_00904 [Capsaspora owczarzaki ATCC 30864]
	0	0	-9.23235	down	2-C-methyl-D-erythritol 4-phosphate cytidylyltransferase-like protein [Zootermopsis nevadensis]
	0	0	-9.23235	down	PREDICTED: magnesium-dependent phosphatase 1-like isoform X2 [Aplysia californica]
	0	0	-9.23235	down	--
	0	0	-9.23235	down	hypothetical protein TRIADDRAFT_56757 [Trichoplax adhaerens]
	0	0	-9.23235	down	conserved hypothetical protein [Pediculus humanus corporis]
	0	0	-9.23235	down	ankyrin repeat protein [Trichomonas vaginalis G3]
	0	0	-9.23235	down	receptor-type tyrosine-protein phosphatase delta [Clonorchis sinensis]
	0	0	-9.23235	down	LYR motif containing protein 5 [Trichuris trichiura]
	0	0	-9.23235	down	Muscle M-line assembly protein unc-89 [Zootermopsis nevadensis]
	0	0	-9.23235	down	--
	0	0	-9.23235	down	Signal-induced proliferation-associated 1-like protein 2 [Zootermopsis nevadensis]
	0	0	-9.23235	down	predicted protein [Nematostella vectensis]
	0	0	-9.23235	down	hypothetical protein L798_03607 [Zootermopsis nevadensis]
	0	0	-9.23235	down	T-complex protein 1 subunit beta [Zootermopsis nevadensis]
	0	0	-9.23235	down	cytochrome b2 [Salpingoeca rosetta]
	0	0	-9.23235	down	hypothetical protein Phum_PHUM148620 [Pediculus humanus corporis]
	0	0	-9.23235	down	SGT1-like protein [Crassostrea gigas]
	0	0	-9.23235	down	--
	0	0	-9.23235	down	--
	0	0	-9.23235	down	--
	0	0	-9.23235	down	PREDICTED: hypothetical protein LOC100746966 [Bombus impatiens]
	0	0	-9.23235	down	--
	0	0	-9.23235	down	hypothetical protein H696_01623 [Fonticula alba]
	0	0	-9.23235	down	PREDICTED: NADPH-dependent diflavin oxidoreductase 1-like [Aplysia californica]
	0	0	-9.23235	down	--
	0	0	-9.23235	down	PREDICTED: protein KTI12 homolog [Ceratitis capitata]
	0	0	-9.23235	down	tRNA (Uracil-5-)-methyltransferase [Hammondia hammondi]
	0	0	-9.23235	down	hypothetical protein L798_09799, partial [Zootermopsis nevadensis]
	0	0	-9.23235	down	--
	0	0	-9.23235	down	PREDICTED: LOW QUALITY PROTEIN: SH3 domain-containing YSC84-like protein 1-like [Saccoglossus kowalevskii]
	0	0	-9.23235	down	hypothetical protein DICPUDRAFT_54227 [Dictyostelium purpureum]
	0	0	-9.23235	down	regucalcin [Papilio xuthus]
	0	0	-9.23235	down	--
	0	0	-9.23235	down	hypothetical protein PPL_10033 [Polysphondylium pallidum PN500]
	0	0	-9.23235	down	predicted protein [Nematostella vectensis]
	0	0	-9.23235	down	hypothetical protein DFA_00552 [Dictyostelium fasciculatum]
	0	0	-9.23235	down	profilin II, putative [Acanthamoeba castellanii str. Neff]
	0	0	-9.23235	down	Serine-enriched protein, partial [Zootermopsis nevadensis]
	0	0	-9.23235	down	--
	0	0	-9.23235	down	--
	0	0	-9.23235	down	hypothetical protein Phum_PHUM156690 [Pediculus humanus corporis]
	0	0	-9.23235	down	--
	0	0	-9.23235	down	Blood vessel epicardial substance, partial [Zootermopsis nevadensis]
	0	0	-9.23235	down	hypothetical protein AaeL_AAEL012820 [Aedes aegypti]
	0	0	-9.23235	down	hypothetical protein [Monosiga brevicollis MX1]
	0	0	-9.23235	down	PREDICTED: protein unc-80 homolog [Tribolium castaneum]
	0	0	-9.23235	down	PREDICTED: uncharacterized protein LOC100164648 [Acyrthosiphon pisum]
	0	0	-9.23235	down	--
	0	0	-9.23235	down	hypothetical protein CAOG_00406 [Capsaspora owczarzaki ATCC 30864]
	0	0	-9.23235	down	PREDICTED: hypothetical protein LOC100639221 [Amphimedon queenslandica]
	0	0	-9.23235	down	--
	0	0	-9.23235	down	PREDICTED: uncharacterized protein LOC103512932 [Diaphorina citri]
	0	0	-9.23235	down	hypothetical protein X777_14443 [Cerapachys biroi]
	0	0	-9.23235	down	Retrovirus-related Pol polyprotein from transposon 412, partial [Stegodyphus mimosarum]
	0	0	-9.23235	down	--
	0	0	-9.23235	down	LOW QUALITY PROTEIN: hypothetical protein M514_22733 [Trichuris suis]
	0	0	-9.23235	down	--
	0	0	-9.23235	down	PREDICTED: N-(5-amino-5-carboxypentanoyl)-L-cysteinyl-D-valine synthase-like [Diaphorina citri]
	0	0	-9.23235	down	--
	0	0	-9.23235	down	PREDICTED: PH-interacting protein isoform X3 [Harpegnathos saltator]
	0	0	-9.23235	down	--
	0	0	-9.23235	down	--
	0	0	-9.23235	down	--
	0	0	-9.23235	down	PREDICTED: putative GPI-anchored protein PB15E9.01c [Diaphorina citri]
	0	0	-9.23235	down	--
	0	0	-9.23235	down	peptidase, S8/S53 subfamily protein [Acanthamoeba castellanii str. Neff]
	0	0	-9.23235	down	ataxin-2 [Polysphondylium pallidum PN500]
	0	0	-9.23235	down	--
	0	0	-9.23235	down	PREDICTED: uncharacterized protein LOC100573992 [Acyrthosiphon pisum]
	0	0	-9.23235	down	--
	0	0	-9.23235	down	LIM/homeobox protein Awh [Zootermopsis nevadensis]
	0	0	-9.23235	down	PREDICTED: uncharacterized protein YbiU-like [Ceratitis capitata]
	0	0	-9.23235	down	predicted protein [Nematostella vectensis]
	0	0	-9.23235	down	--
	0	0	-9.23235	down	--
	0	0	-9.23235	down	monocarboxylate transporter [Aedes aegypti]
	0	0	-9.23235	down	--
	0	0	-9.23235	down	--
	0	0	-9.23235	down	predicted protein [Naegleria gruberi]
	0	0	-9.23235	down	--
	0	0	-9.23235	down	hypothetical protein CAOG_07310 [Capsaspora owczarzaki ATCC 30864]
	0	0	-9.23235	down	--
	0	0	-9.23235	down	conserved hypothetical protein [Pediculus humanus corporis]
	0	0	-9.23235	down	AP2-associated protein kinase 1 [Zootermopsis nevadensis]
	0	0	-9.23235	down	hypothetical protein TcasGA2_TC008243 [Tribolium castaneum]
	0	0	-9.23235	down	--
	0	0	-9.23235	down	PREDICTED: uncharacterized protein LOC103315166 [Tribolium castaneum]
	0	0	-9.23235	down	PREDICTED: ATP-dependent RNA helicase ddx24 [Diaphorina citri]
	0	0	-9.23235	down	TATA-binding protein-associated factor 172 [Zootermopsis nevadensis]
	0	0	-9.23235	down	PREDICTED: striatin-3-like [Amphimedon queenslandica]
	0	0	-9.23235	down	hypothetical protein [Monosiga brevicollis MX1]
	0	0	-9.23235	down	--
	0	0	-9.23235	down	--
	0	0	-9.23235	down	hypothetical protein TcasGA2_TC007991 [Tribolium castaneum]
	0	0	-9.23235	down	Ankyrin repeat domain-containing protein 27, partial [Zootermopsis nevadensis]
	0	0	-9.23235	down	--
	0	0	-9.23235	down	--
	0	0	-9.23235	down	--
	0	0	-9.23235	down	--
	0	0	-9.23235	down	GE10665 [Drosophila yakuba]
	0	0	-9.23235	down	hypothetical protein LOTGIDRAFT_233685 [Lottia gigantea]
	0	0	-9.23235	down	PREDICTED: serine/threonine-protein phosphatase 4 catalytic subunit-like, partial [Apis mellifera]
	0	0	-9.23235	down	--
	0	0	-9.23235	down	--
	0	0	-9.23235	down	--
	0	0	-9.23235	down	--
	0	0	-9.23235	down	WD repeat-containing protein mio [Zootermopsis nevadensis]
	0	0	-9.23235	down	membrane protein, putative [Acanthamoeba castellanii str. Neff]
	0	0	-9.23235	down	peptidase dimerization domain protein [Necator americanus]
	0	0	-9.23235	down	PREDICTED: uncharacterized protein LOC103524972 [Diaphorina citri]
	0	0	-9.23235	down	Leucine-rich repeat-containing protein 8A [Zootermopsis nevadensis]
	0	0	-9.23235	down	--
	0	0	-9.23235	down	--
	0	0	-9.23235	down	hypothetical protein HELRODRAFT_182927 [Helobdella robusta]
	0	0	-9.23235	down	--
	0	0	-9.23235	down	PREDICTED: ran-binding protein 3 isoform X1 [Tribolium castaneum]
	0	0	-9.23235	down	NAD-dependent deacetylase sirtuin-5 [Lepeophtheirus salmonis]
	0	0	-9.23235	down	PREDICTED: inhibitor of growth protein 1-like [Diaphorina citri]
	0	0	-9.23235	down	hypothetical protein CAPTEDRAFT_94711 [Capitella teleta]
	0	0	-9.23235	down	CatecholO-methyltransferase domain containing protein 1, putative [Acanthamoeba castellanii str. Neff]
	0	0	-9.23235	down	PREDICTED: ATP-dependent RNA helicase DDX54 [Ciona intestinalis]
	0	0	-9.23235	down	GH18757 [Drosophila grimshawi]
	0	0	-9.23235	down	phosphoenolpyruvate carboxykinase [Polysphondylium pallidum PN500]
	0	0	-9.23235	down	PREDICTED: uncharacterized protein LOC105153053, partial [Acromyrmex echinatior]
	0	0	-9.23235	down	PREDICTED: molybdenum cofactor sulfurase 1 [Tribolium castaneum]
	0	0	-9.23235	down	PREDICTED: signal transduction histidine-protein kinase BarA-like [Ceratitis capitata]
	0	0	-9.23235	down	hypothetical protein LOTGIDRAFT_136939 [Lottia gigantea]
	0	0	-9.23235	down	predicted protein [Nematostella vectensis]
	0	0	-9.23235	down	31 kDa antigen [Plasmodium berghei]
	0	0	-9.23235	down	3methyl-2-oxobutanoate hydroxymethyltransferase [Acanthamoeba castellanii str. Neff]
	0	0	-9.23235	down	acetylornithine transaminase [Dictyostelium discoideum AX4]
	0	0	-9.23235	down	PREDICTED: lysine-specific permease-like [Ceratitis capitata]
	0	0	-9.23235	down	dihydroxy-acid dehydratase, partial [Nilaparvata lugens]
	0	0	-9.23235	down	hypothetical protein DICPUDRAFT_81386 [Dictyostelium purpureum]
	0	0	-9.23235	down	sulfate adenylyltransferase [Fonticula alba]
	0	0	-9.23235	down	hypothetical protein CAOG_05685 [Capsaspora owczarzaki ATCC 30864]
	0	0	-9.23235	down	hypothetical protein SAMD00019534_007800 [Acytostelium subglobosum LB1]
	0	0	-9.23235	down	hypothetical protein [Monosiga brevicollis MX1]
	0	0	-9.23235	down	PREDICTED: 60S ribosomal protein L3 [Acromyrmex echinatior]
	0	0	-9.23235	down	cytochrome b2 [Salpingoeca rosetta]
	0	0	-9.23235	down	PREDICTED: 6-phosphofructo-2-kinase/fructose-2,6-bisphosphatase 1-like [Strongylocentrotus purpuratus]
	0	0	-9.23235	down	hypothetical protein LOTGIDRAFT_223492 [Lottia gigantea]
	0	0	-9.23235	down	musashi [Loa loa]
	0	0	-9.23235	down	unknown [Dendroctonus ponderosae]
	0	0	-9.23235	down	hypothetical protein HELRODRAFT_185694 [Helobdella robusta]
	0	0	-9.23235	down	predicted protein [Nematostella vectensis]
	0	0	-9.23235	down	hypothetical protein CAOG_03906 [Capsaspora owczarzaki ATCC 30864]
	0	0	-9.23235	down	hypothetical protein LOTGIDRAFT_206131 [Lottia gigantea]
	0	0	-9.23235	down	PREDICTED: glycogen debranching enzyme-like isoform X2 [Aplysia californica]
	0	0	-9.23235	down	thiamine pyrophosphokinase [Acanthamoeba castellanii str. Neff]
	0	0	-9.23235	down	fructose-1,6-bisphosphate aldolase, putative [Perkinsus marinus ATCC 50983]
	0	0	-9.23235	down	hypothetical protein TRIADDRAFT_25960 [Trichoplax adhaerens]
	0	0	-9.23235	down	phosphofructokinase, putative [Ichthyophthirius multifiliis]
	0	0	-9.23235	down	hypothetical protein SAMD00019534_009430 [Acytostelium subglobosum LB1]
	0	0	-9.23235	down	GL12416 [Drosophila persimilis]
	0	0	-9.23235	down	hypothetical protein HELRODRAFT_159582 [Helobdella robusta]
	0	0	-9.23235	down	Leucine-rich repeat-containing protein 24 [Zootermopsis nevadensis]
	0	0	-9.23235	down	branched-chain-amino-acid aminotransferase, putative [Entamoeba invadens IP1]
	0	0	-9.23235	down	cyclic nucleotide-specific phosphodiesterase PDE2A [Trypanosoma brucei]
	0	0	-9.23235	down	WD repeat domain phosphoinositide-interacting protein 2 [Capsaspora owczarzaki ATCC 30864]
	0	0	-9.23235	down	60S ribosomal protein L10-A [Fonticula alba]
	0	0	-9.23235	down	UDP-glucosyl transferase-like protein [Adineta vaga]
	0	0	-9.23235	down	PREDICTED: long-chain-fatty-acid--CoA ligase 5-like [Strongylocentrotus purpuratus]
	0	0	-9.23235	down	hypothetical protein [Monosiga brevicollis MX1]
	0	0	-9.23235	down	hypothetical protein TRIADDRAFT_18732 [Trichoplax adhaerens]
	0	0	-9.23235	down	ATP-dependent helicase [Salpingoeca rosetta]
	0	0	-9.23235	down	saccharopine reductase [Nilaparvata lugens]
	0	0	-9.23235	down	PREDICTED: cytochrome b-c1 complex subunit 6, mitochondrial-like [Strongylocentrotus purpuratus]
	0	0	-9.23235	down	predicted protein [Nematostella vectensis]
	0	0	-9.23235	down	PREDICTED: 28S ribosomal protein S5, mitochondrial-like [Saccoglossus kowalevskii]
	0	0	-9.23235	down	large subunit ribosomal protein 1 [Capsaspora owczarzaki ATCC 30864]
	0	0	-9.23235	down	cystathionine gamma-lyase [Fonticula alba]
	0	0	-9.23235	down	hypothetical protein H696_05027 [Fonticula alba]
	0	0	-9.23235	down	PREDICTED: 6-phosphogluconate dehydrogenase, decarboxylating isoform 1 [Strongylocentrotus purpuratus]
	0	0	-9.23235	down	hypothetical protein BRAFLDRAFT_83728 [Branchiostoma floridae]
	0	0	-9.23235	down	RING zinc finger-containing protein [Dictyostelium fasciculatum]
	0	0	-9.23235	down	hypothetical protein H696_02079 [Fonticula alba]
	0	0	-9.23235	down	elongation factor 1-alpha [Litopenaeus stylirostris]
	0	0	-9.23235	down	PREDICTED: cathepsin L-like [Strongylocentrotus purpuratus]
	0	0	-9.23235	down	fructose-1-6-bisphosphatase [Capsaspora owczarzaki ATCC 30864]
	0	0	-9.23235	down	multidrug resistance protein 1a [Capsaspora owczarzaki ATCC 30864]
	0	0	-9.23235	down	PREDICTED: probable glutamine-dependent NAD(+) synthetase [Tribolium castaneum]
	0	0	-9.23235	down	cysteine synthase [Acanthamoeba castellanii str. Neff]
lst-miR-n94-5p	4.83871e-06	1e-06	-3.92654	down	LIM domain transcription factor LMO4, putative [Pediculus humanus corporis]
lst-miR-n33-3p	0.000970408	0.000317	-3.92654	down	PREDICTED: RNA polymerase II-associated protein 1 [Harpegnathos saltator]
	0.000970408	0.000317	-3.92654	down	hypothetical protein [Plasmodium chabaudi chabaudi]
	0.000970408	0.000317	-3.92654	down	--
	0.000970408	0.000317	-3.92654	down	--
	0.000970408	0.000317	-3.92654	down	PREDICTED: uncharacterized protein LOC663634 isoform X2 [Tribolium castaneum]
	0.000970408	0.000317	-3.92654	down	sugar transporter [Nilaparvata lugens]
	0.000970408	0.000317	-3.92654	down	hypothetical protein BRAFLDRAFT_88575 [Branchiostoma floridae]
	0.000970408	0.000317	-3.92654	down	PREDICTED: E3 ubiquitin-protein ligase RNF13-like [Camponotus floridanus]
lst-miR-n71-5p	0.0306033	0.01877	-1.56397	down	hypothetical protein L798_07317 [Zootermopsis nevadensis]
lst-miR-n2-5p	0.0495649	0.036678	-1.49359	down	PREDICTED: glutaredoxin domain-containing cysteine-rich protein CG31559-like, partial [Diaphorina citri]
	0.0495649	0.036678	-1.49359	down	KDEL motif-containing protein 1 [Zootermopsis nevadensis]
lst-miR-n8-5p	0.00228679	0.000808	-1.49358	down	Rho-related BTB domain-containing protein 2, partial [Zootermopsis nevadensis]
	0.00228679	0.000808	-1.49358	down	PREDICTED: nose resistant to fluoxetine protein 6-like [Acyrthosiphon pisum]
	0.00228679	0.000808	-1.49358	down	PREDICTED: drebrin-like protein-like [Amphimedon queenslandica]
	0.00228679	0.000808	-1.49358	down	PREDICTED: guanine nucleotide-binding protein-like 1 isoform X2 [Tribolium castaneum]
	0.00228679	0.000808	-1.49358	down	--
	0.00228679	0.000808	-1.49358	down	--
lst-miR-n36-5p	0.0281835	0.017098	-1.43469	down	U2 small nuclear ribonucleoprotein auxiliary factor 35 kDa subunit-related protein 1 [Zootermopsis nevadensis]
	0.0281835	0.017098	-1.43469	down	PREDICTED: vitellogenin-6 [Acyrthosiphon pisum]
	0.0281835	0.017098	-1.43469	down	Cyclin-C [Zootermopsis nevadensis]
	0.0281835	0.017098	-1.43469	down	conserved hypothetical protein [Culex quinquefasciatus]
	0.0281835	0.017098	-1.43469	down	Methylosome subunit pICln [Zootermopsis nevadensis]
	0.0281835	0.017098	-1.43469	down	Pre-mRNA 3&apos;-end-processing factor FIP1 [Zootermopsis nevadensis]
	0.0281835	0.017098	-1.43469	down	cathepsin B, partial [Riptortus pedestris]
	0.0281835	0.017098	-1.43469	down	--
	0.0281835	0.017098	-1.43469	down	PREDICTED: uncharacterized protein LOC103518129 [Diaphorina citri]
	0.0281835	0.017098	-1.43469	down	Tensin, partial [Zootermopsis nevadensis]
	0.0281835	0.017098	-1.43469	down	hypothetical protein X777_12279 [Cerapachys biroi]
	0.0281835	0.017098	-1.43469	down	AGAP002064-PA-like protein [Anopheles sinensis]
	0.0281835	0.017098	-1.43469	down	predicted protein [Pediculus humanus corporis]
	0.0281835	0.017098	-1.43469	down	FAST kinase domain-containing protein 2 [Zootermopsis nevadensis]
	0.0281835	0.017098	-1.43469	down	hypothetical protein D910_00043, partial [Dendroctonus ponderosae]
	0.0281835	0.017098	-1.43469	down	PREDICTED: uncharacterized protein LOC100572526 [Acyrthosiphon pisum]
	0.0281835	0.017098	-1.43469	down	Trafficking protein particle complex subunit 5 [Zootermopsis nevadensis]
	0.0281835	0.017098	-1.43469	down	Pancreatic lipase-related protein 2 [Zootermopsis nevadensis]
	0.0281835	0.017098	-1.43469	down	Putative fatty acyl-CoA reductase [Zootermopsis nevadensis]
lst-miR-n10-3p	0.000259756	7.1e-05	-1.38465	down	Nuclear hormone receptor FTZ-F1 beta [Zootermopsis nevadensis]
	0.000259756	7.1e-05	-1.38465	down	PREDICTED: MAP kinase-activating death domain protein-like isoform X5 [Apis dorsata]
	0.000259756	7.1e-05	-1.38465	down	hypothetical protein L798_10738, partial [Zootermopsis nevadensis]
	0.000259756	7.1e-05	-1.38465	down	hypothetical protein SINV_07792 [Solenopsis invicta]
	0.000259756	7.1e-05	-1.38465	down	coatomer alpha subunit, putative [Pediculus humanus corporis]
	0.000259756	7.1e-05	-1.38465	down	Putative ATP-dependent RNA helicase DHX30 [Zootermopsis nevadensis]
	0.000259756	7.1e-05	-1.38465	down	G patch domain-containing protein 2 [Zootermopsis nevadensis]
	0.000259756	7.1e-05	-1.38465	down	PREDICTED: phospholipid scramblase 1-like [Saccoglossus kowalevskii]
	0.000259756	7.1e-05	-1.38465	down	hypothetical protein L798_03266 [Zootermopsis nevadensis]
	0.000259756	7.1e-05	-1.38465	down	--
	0.000259756	7.1e-05	-1.38465	down	PREDICTED: uncharacterized protein LOC103308774 [Acyrthosiphon pisum]
	0.000259756	7.1e-05	-1.38465	down	--
	0.000259756	7.1e-05	-1.38465	down	gamma-butyrobetaine dioxygenase [Capsaspora owczarzaki ATCC 30864]
	0.000259756	7.1e-05	-1.38465	down	endonuclease-reverse transcriptase [Bombyx mori]
	0.000259756	7.1e-05	-1.38465	down	RasGEF domain containing protein [Acanthamoeba castellanii str. Neff]
	0.000259756	7.1e-05	-1.38465	down	Proliferating cell nuclear antigen [Zootermopsis nevadensis]
	0.000259756	7.1e-05	-1.38465	down	Syntaxin-16 [Crassostrea gigas]
	0.000259756	7.1e-05	-1.38465	down	predicted protein [Naegleria gruberi]
lst-miR-n39-3p	0.0458929	0.032125	-1.34158	down	PREDICTED: zinc finger BED domain-containing protein 4-like [Acyrthosiphon pisum]
lst-miR-n18-5p	0.0412121	0.028299	-1.24204	down	PREDICTED: heat shock 70 kDa protein cognate 4-like, partial [Acyrthosiphon pisum]
	0.0412121	0.028299	-1.24204	down	--
	0.0412121	0.028299	-1.24204	down	PREDICTED: bromodomain adjacent to zinc finger domain protein 1A isoform X6 [Microplitis demolitor]
	0.0412121	0.028299	-1.24204	down	Tyrosine-protein phosphatase 69D [Zootermopsis nevadensis]
	0.0412121	0.028299	-1.24204	down	PREDICTED: solute carrier organic anion transporter family member 2A1 [Solenopsis invicta]
	0.0412121	0.028299	-1.24204	down	Putative protein kinase C delta type-like protein, partial [Zootermopsis nevadensis]
	0.0412121	0.028299	-1.24204	down	PREDICTED: uncharacterized protein LOC100680511 [Nasonia vitripennis]
	0.0412121	0.028299	-1.24204	down	PREDICTED: zinc finger protein Noc [Tribolium castaneum]
	0.0412121	0.028299	-1.24204	down	--
	0.0412121	0.028299	-1.24204	down	PREDICTED: protein SEC13 homolog, partial [Saccoglossus kowalevskii]
lst-miR-n69-3p	0.000629348	0.000193	-1.0536	down	G protein pathway suppressor 2 [Zootermopsis nevadensis]
	0.000629348	0.000193	-1.0536	down	Heat shock factor 2-binding protein [Zootermopsis nevadensis]
	0.000629348	0.000193	-1.0536	down	O-phosphoseryl-tRNA(Sec) selenium transferase [Zootermopsis nevadensis]
	0.000629348	0.000193	-1.0536	down	block of proliferation 1 [Monosiga brevicollis MX1]
	0.000629348	0.000193	-1.0536	down	hypothetical protein BRAFLDRAFT_241494 [Branchiostoma floridae]
	0.000629348	0.000193	-1.0536	down	protein kinase domain containing protein [Acanthamoeba castellanii str. Neff]
	0.000629348	0.000193	-1.0536	down	PREDICTED: T-cell immunomodulatory protein [Nasonia vitripennis]
	0.000629348	0.000193	-1.0536	down	Phosphoribosyl pyrophosphate synthetase-associated protein 2 [Zootermopsis nevadensis]
	0.000629348	0.000193	-1.0536	down	PREDICTED: vi polysaccharide biosynthesis protein VipA/TviB-like [Hydra vulgaris]
	0.000629348	0.000193	-1.0536	down	PREDICTED: uncharacterized protein LOC100141567 isoform X1 [Tribolium castaneum]
	0.000629348	0.000193	-1.0536	down	PREDICTED: SEC23-interacting protein-like isoform X5 [Nasonia vitripennis]
	0.000629348	0.000193	-1.0536	down	--
	0.000629348	0.000193	-1.0536	down	PREDICTED: serine palmitoyltransferase small subunit A [Nasonia vitripennis]
	0.000629348	0.000193	-1.0536	down	--
	0.000629348	0.000193	-1.0536	down	conserved hypothetical protein [Pediculus humanus corporis]
	0.000629348	0.000193	-1.0536	down	Early growth response protein, putative [Pediculus humanus corporis]
	0.000629348	0.000193	-1.0536	down	hypothetical protein [Trichomonas vaginalis G3]
	0.000629348	0.000193	-1.0536	down	PREDICTED: zinc finger protein 425-like [Diaphorina citri]
	0.000629348	0.000193	-1.0536	down	FAD-dependent oxidoreductase, putative [Acanthamoeba castellanii str. Neff]
	0.000629348	0.000193	-1.0536	down	ATP citrate synthase [Dictyostelium fasciculatum]
lst-miR-n59-3p	0.0138708	0.006658	-1.01965	down	PREDICTED: LOW QUALITY PROTEIN: neurexin-1 [Tribolium castaneum]
lst-miR-n34-5p	0.00351545	0.001289	1.1279	up	Dihydrolipoyl dehydrogenase, mitochondrial [Zootermopsis nevadensis]
lst-miR-n66-5p	0	0	1.22795	up	hypothetical protein ACA1_164640 [Acanthamoeba castellanii str. Neff]
	0	0	1.22795	up	hypothetical protein SAMD00019534_093290 [Acytostelium subglobosum LB1]
lst-miR-n9-5p	0.0229554	0.012855	1.24338	up	PREDICTED: probable glutamine--tRNA ligase [Solenopsis invicta]
	0.0229554	0.012855	1.24338	up	PREDICTED: spectrin beta chain, non-erythrocytic 2 isoform X2 [Harpegnathos saltator]
lst-miR-n25-1-3p	0.0462507	0.032838	1.24338	up	Kelch domain-containing protein 10 [Zootermopsis nevadensis]
	0.0462507	0.032838	1.24338	up	PREDICTED: myotubularin-related protein 4-like isoform X1 [Ceratitis capitata]
lst-miR-n25-2-3p	0.0462507	0.032838	1.24338	up	salivary secreted ribonuclease [Anopheles darlingi]
	0.0462507	0.032838	1.24338	up	PREDICTED: myosin light chain kinase, smooth muscle-like [Harpegnathos saltator]
lst-miR-n86-5p	0.0067119	0.002819	1.28777	up	PREDICTED: WD repeat-containing protein 89-like [Strongylocentrotus purpuratus]
	0.0067119	0.002819	1.28777	up	hypothetical protein HELRODRAFT_111042 [Helobdella robusta]
lst-miR-n5-5p	0	0	1.31755	up	Glycosyltransferase 8 domain-containing protein 4 [Zootermopsis nevadensis]
	0	0	1.31755	up	elongase, putative [Aedes aegypti]
	0	0	1.31755	up	target of rapamycin [Nilaparvata lugens]
	0	0	1.31755	up	PREDICTED: uncharacterized protein LOC103569478 [Microplitis demolitor]
	0	0	1.31755	up	--
	0	0	1.31755	up	PREDICTED: uncharacterized protein LOC105206592 [Solenopsis invicta]
	0	0	1.31755	up	Alpha-1A adrenergic receptor, partial [Zootermopsis nevadensis]
	0	0	1.31755	up	UBX domain-containing protein 7, partial [Stegodyphus mimosarum]
	0	0	1.31755	up	hypothetical protein WUBG_13665, partial [Wuchereria bancrofti]
	0	0	1.31755	up	hypothetical protein H696_02713 [Fonticula alba]
	0	0	1.31755	up	PREDICTED: GTPase-activating protein and VPS9 domain-containing protein 1-like [Bombus impatiens]
	0	0	1.31755	up	PREDICTED: uncharacterized protein LOC103524569 [Diaphorina citri]
	0	0	1.31755	up	reverse transcriptase [Anopheles gambiae]
	0	0	1.31755	up	PREDICTED: ribosomal L1 domain-containing protein 1-like [Megachile rotundata]
	0	0	1.31755	up	PREDICTED: protein odd-skipped [Diaphorina citri]
	0	0	1.31755	up	Breast carcinoma-amplified sequence 3-like protein [Zootermopsis nevadensis]
	0	0	1.31755	up	PREDICTED: uncharacterized protein LOC100575279 [Acyrthosiphon pisum]
	0	0	1.31755	up	Protein phosphatase 1K, mitochondrial [Lepeophtheirus salmonis]
	0	0	1.31755	up	hypothetical protein L798_05256 [Zootermopsis nevadensis]
	0	0	1.31755	up	PREDICTED: voltage-dependent T-type calcium channel subunit alpha-1G isoform X2 [Acromyrmex echinatior]
	0	0	1.31755	up	multidrug resistance-associated protein 3 [Capsaspora owczarzaki ATCC 30864]
	0	0	1.31755	up	Dihydrolipoyllysine-residue succinyltransferase component of 2-oxoglutarate dehydrogenase complex, mitochondrial [Schistosoma haematobium]
	0	0	1.31755	up	--
lst-miR-750-2-3p	0.00311389	0.001121	1.52349	up	hypothetical protein H696_00315 [Fonticula alba]
	0.00311389	0.001121	1.52349	up	--
	0.00311389	0.001121	1.52349	up	hypothetical protein SAMD00019534_103930 [Acytostelium subglobosum LB1]
lst-miR-n73-3p	0.023138	0.012803	1.94383	up	Methionine adenosyltransferase 2 subunit beta [Zootermopsis nevadensis]
	0.023138	0.012803	1.94383	up	serine protease 7 [Nilaparvata lugens]
	0.023138	0.012803	1.94383	up	hypothetical protein L798_06196, partial [Zootermopsis nevadensis]
	0.023138	0.012803	1.94383	up	PREDICTED: dehydrogenase/reductase SDR family member 11-like isoform X2 [Diaphorina citri]
	0.023138	0.012803	1.94383	up	PREDICTED: ninjurin-1 [Tribolium castaneum]
	0.023138	0.012803	1.94383	up	PREDICTED: dynein heavy chain 7, axonemal-like [Acyrthosiphon pisum]
	0.023138	0.012803	1.94383	up	PREDICTED: guanine nucleotide-binding protein subunit beta-2-like 1-like [Saccoglossus kowalevskii]
	0.023138	0.012803	1.94383	up	hypothetical protein HELRODRAFT_73207 [Helobdella robusta]
lst-miR-n20-5p	0.0055625	0.002225	2.05074	up	--
	0.0055625	0.002225	2.05074	up	PREDICTED: tubby-related protein 4 [Tribolium castaneum]
	0.0055625	0.002225	2.05074	up	PREDICTED: uncharacterized protein LOC103507979 [Diaphorina citri]
	0.0055625	0.002225	2.05074	up	sodium leak channel non selective protein [Hymenolepis microstoma]
	0.0055625	0.002225	2.05074	up	putative SEC63 protein [Danaus plexippus]
lst-miR-n53-5p	0.0435173	0.030172	2.24337	up	PREDICTED: putative fatty acyl-CoA reductase CG8306 [Solenopsis invicta]
	0.0435173	0.030172	2.24337	up	PREDICTED: uncharacterized protein LOC100209733 [Hydra vulgaris]
lst-miR-n19-5p	0.000636667	0.000191	2.46577	up	hypothetical protein DAPPUDRAFT_315174 [Daphnia pulex]
lst-miR-n31-3p	0	0	2.62805	up	predicted protein [Nematostella vectensis]
	0	0	2.62805	up	PREDICTED: pogo transposable element with KRAB domain-like [Hydra vulgaris]
lst-miR-n81-5p	0.0191788	0.009973	2.7028	up	sugar transporter 8 [Nilaparvata lugens]
	0.0191788	0.009973	2.7028	up	PREDICTED: zinc finger protein 502 [Tribolium castaneum]
	0.0191788	0.009973	2.7028	up	PREDICTED: protein piccolo-like [Bombyx mori]
	0.0191788	0.009973	2.7028	up	Chondroitin sulfate synthase, putative [Pediculus humanus corporis]
	0.0191788	0.009973	2.7028	up	TAF6-like RNA polymerase II p300/CBP-associated factor-associated factor 65 kDa subunit 6L [Zootermopsis nevadensis]
	0.0191788	0.009973	2.7028	up	PREDICTED: ABC transporter G family member 23-like [Acyrthosiphon pisum]
	0.0191788	0.009973	2.7028	up	synaptotagmin 1 [Apis mellifera]
	0.0191788	0.009973	2.7028	up	low-density lipoprotein receptor, putative [Pediculus humanus corporis]
	0.0191788	0.009973	2.7028	up	Fasciclin-2, partial [Zootermopsis nevadensis]
	0.0191788	0.009973	2.7028	up	PREDICTED: adenomatous polyposis coli protein-like isoform X3 [Apis dorsata]
	0.0191788	0.009973	2.7028	up	conserved hypothetical protein [Pediculus humanus corporis]
	0.0191788	0.009973	2.7028	up	Transcription initiation factor TFIID subunit 2 [Zootermopsis nevadensis]
	0.0191788	0.009973	2.7028	up	lipase containing protein, putative [Pediculus humanus corporis]
	0.0191788	0.009973	2.7028	up	nudel-like protein [Nilaparvata lugens]
	0.0191788	0.009973	2.7028	up	Enhancer of mRNA-decapping protein 4 [Camponotus floridanus]
	0.0191788	0.009973	2.7028	up	PREDICTED: sperm-associated antigen 6-like [Bombus impatiens]
	0.0191788	0.009973	2.7028	up	1-phosphatidylinositol-4,5-bisphosphate phosphodiesterase epsilon-1, partial [Zootermopsis nevadensis]
	0.0191788	0.009973	2.7028	up	cytochrome P450 CYP6ER2, partial [Laodelphax striatella]
	0.0191788	0.009973	2.7028	up	Ceramide kinase [Zootermopsis nevadensis]
	0.0191788	0.009973	2.7028	up	hypothetical protein L798_01229 [Zootermopsis nevadensis]
	0.0191788	0.009973	2.7028	up	E3 ubiquitin-protein ligase UBR2 [Zootermopsis nevadensis]
	0.0191788	0.009973	2.7028	up	Heat shock factor protein [Camponotus floridanus]
	0.0191788	0.009973	2.7028	up	PREDICTED: tolloid-like protein 1 isoform X1 [Acromyrmex echinatior]
	0.0191788	0.009973	2.7028	up	PREDICTED: uncharacterized protein LOC100161816 [Acyrthosiphon pisum]
	0.0191788	0.009973	2.7028	up	tyrosine kinase receptor, putative [Pediculus humanus corporis]
	0.0191788	0.009973	2.7028	up	amidase [Capsaspora owczarzaki ATCC 30864]
	0.0191788	0.009973	2.7028	up	--
	0.0191788	0.009973	2.7028	up	--
	0.0191788	0.009973	2.7028	up	hypothetical protein CAOG_04552 [Capsaspora owczarzaki ATCC 30864]
	0.0191788	0.009973	2.7028	up	Papilin [Zootermopsis nevadensis]
	0.0191788	0.009973	2.7028	up	--
	0.0191788	0.009973	2.7028	up	Vacuolar protein sorting-associated protein 53-like protein [Zootermopsis nevadensis]
	0.0191788	0.009973	2.7028	up	hypothetical protein L798_12005 [Zootermopsis nevadensis]
	0.0191788	0.009973	2.7028	up	light harvesting complex protein LHCII-3 [Gymnochlora stellata]
	0.0191788	0.009973	2.7028	up	PREDICTED: O-methyltransferase MdmC-like [Ceratitis capitata]
	0.0191788	0.009973	2.7028	up	PREDICTED: protein still life, isoform SIF type 1 [Tribolium castaneum]
	0.0191788	0.009973	2.7028	up	Sterol regulatory element-binding protein 1 [Zootermopsis nevadensis]
	0.0191788	0.009973	2.7028	up	PREDICTED: dedicator of cytokinesis protein 7 [Diaphorina citri]
	0.0191788	0.009973	2.7028	up	putative ATP-dependent RNA helicase YTHDC2 [Zootermopsis nevadensis]
	0.0191788	0.009973	2.7028	up	--
	0.0191788	0.009973	2.7028	up	--
	0.0191788	0.009973	2.7028	up	PREDICTED: nuclear migration protein nudC-like [Apis mellifera]
	0.0191788	0.009973	2.7028	up	PREDICTED: monocarboxylate transporter 12-B-like, partial [Apis dorsata]
	0.0191788	0.009973	2.7028	up	hypothetical protein L798_15216 [Zootermopsis nevadensis]
	0.0191788	0.009973	2.7028	up	--
	0.0191788	0.009973	2.7028	up	Fibronectin type-III domain-containing protein 3a [Zootermopsis nevadensis]
	0.0191788	0.009973	2.7028	up	PREDICTED: PAX-interacting protein 1-like isoform X1 [Acyrthosiphon pisum]
	0.0191788	0.009973	2.7028	up	predicted protein [Nematostella vectensis]
	0.0191788	0.009973	2.7028	up	--
	0.0191788	0.009973	2.7028	up	--
	0.0191788	0.009973	2.7028	up	--
	0.0191788	0.009973	2.7028	up	--
	0.0191788	0.009973	2.7028	up	--
	0.0191788	0.009973	2.7028	up	hypothetical protein H696_02013 [Fonticula alba]
	0.0191788	0.009973	2.7028	up	PREDICTED: uncharacterized protein LOC100165522 [Acyrthosiphon pisum]
	0.0191788	0.009973	2.7028	up	ovochymase-1-like protein [Nilaparvata lugens]
	0.0191788	0.009973	2.7028	up	mitochondrial carrier protein [Trypanosoma cruzi strain CL Brener]
	0.0191788	0.009973	2.7028	up	--
	0.0191788	0.009973	2.7028	up	PREDICTED: hemicentin-1-like [Megachile rotundata]
	0.0191788	0.009973	2.7028	up	--
	0.0191788	0.009973	2.7028	up	PREDICTED: oxysterol-binding protein-related protein 1-like [Metaseiulus occidentalis]
	0.0191788	0.009973	2.7028	up	predicted protein [Nematostella vectensis]
	0.0191788	0.009973	2.7028	up	endonuclease-reverse transcriptase [Bombyx mori]
	0.0191788	0.009973	2.7028	up	ribosomal protein L14 (mitochondrion) [Jakoba libera]
	0.0191788	0.009973	2.7028	up	hypothetical protein CAOG_09111 [Capsaspora owczarzaki ATCC 30864]
	0.0191788	0.009973	2.7028	up	PREDICTED: SWI/SNF-related matrix-associated actin-dependent regulator of chromatin subfamily A containing DEAD/H box 1 homolog [Tribolium castaneum]
	0.0191788	0.009973	2.7028	up	PREDICTED: protein giant-like isoform X1 [Apis dorsata]
	0.0191788	0.009973	2.7028	up	conserved hypothetical protein [Trypanosoma vivax Y486]
	0.0191788	0.009973	2.7028	up	PREDICTED: myb-like protein P [Diaphorina citri]
	0.0191788	0.009973	2.7028	up	PREDICTED: uncharacterized protein LOC105223997 [Bactrocera dorsalis]
	0.0191788	0.009973	2.7028	up	hypothetical protein DFA_03354 [Dictyostelium fasciculatum]
	0.0191788	0.009973	2.7028	up	--
	0.0191788	0.009973	2.7028	up	--
	0.0191788	0.009973	2.7028	up	--
	0.0191788	0.009973	2.7028	up	hypothetical protein PTSG_07463 [Salpingoeca rosetta]
	0.0191788	0.009973	2.7028	up	--
	0.0191788	0.009973	2.7028	up	Beta-parvin [Zootermopsis nevadensis]
	0.0191788	0.009973	2.7028	up	hypothetical protein L798_12353 [Zootermopsis nevadensis]
	0.0191788	0.009973	2.7028	up	--
	0.0191788	0.009973	2.7028	up	hypothetical protein CAPTEDRAFT_223762 [Capitella teleta]
	0.0191788	0.009973	2.7028	up	SAM domain (Sterile alpha motif) domain containing protein [Acanthamoeba castellanii str. Neff]
	0.0191788	0.009973	2.7028	up	hypothetical protein CAPTEDRAFT_227825 [Capitella teleta]
	0.0191788	0.009973	2.7028	up	AAA ATPase domain-containing protein [Dictyostelium fasciculatum]
	0.0191788	0.009973	2.7028	up	--
	0.0191788	0.009973	2.7028	up	--
	0.0191788	0.009973	2.7028	up	--
	0.0191788	0.009973	2.7028	up	--
	0.0191788	0.009973	2.7028	up	--
	0.0191788	0.009973	2.7028	up	ryanodine receptor [Laodelphax striatella]
	0.0191788	0.009973	2.7028	up	--
	0.0191788	0.009973	2.7028	up	hypothetical protein L798_03314, partial [Zootermopsis nevadensis]
	0.0191788	0.009973	2.7028	up	PREDICTED: phospholipase A1 member A-like [Apis mellifera]
	0.0191788	0.009973	2.7028	up	PREDICTED: uncharacterized protein KIAA1143 homolog [Harpegnathos saltator]
	0.0191788	0.009973	2.7028	up	--
	0.0191788	0.009973	2.7028	up	Tubulin gamma-2 chain [Zootermopsis nevadensis]
	0.0191788	0.009973	2.7028	up	PREDICTED: putative tartrate transporter-like [Ceratitis capitata]
	0.0191788	0.009973	2.7028	up	Transmembrane protein 184C [Echinococcus granulosus]
	0.0191788	0.009973	2.7028	up	WD repeat-containing protein 51A [Zootermopsis nevadensis]
	0.0191788	0.009973	2.7028	up	PREDICTED: uncharacterized protein LOC100167178 [Acyrthosiphon pisum]
	0.0191788	0.009973	2.7028	up	PREDICTED: patched domain-containing protein 3 [Diaphorina citri]
	0.0191788	0.009973	2.7028	up	--
	0.0191788	0.009973	2.7028	up	--
	0.0191788	0.009973	2.7028	up	histidine acid phosphatase domain containing 2A [Capsaspora owczarzaki ATCC 30864]
	0.0191788	0.009973	2.7028	up	PREDICTED: protein CASP-like [Ciona intestinalis]
	0.0191788	0.009973	2.7028	up	PREDICTED: adenosine deaminase CECR1-like [Nasonia vitripennis]
	0.0191788	0.009973	2.7028	up	--
	0.0191788	0.009973	2.7028	up	--
	0.0191788	0.009973	2.7028	up	PREDICTED: uncharacterized protein LOC105203377 [Solenopsis invicta]
	0.0191788	0.009973	2.7028	up	--
	0.0191788	0.009973	2.7028	up	--
	0.0191788	0.009973	2.7028	up	Mediator of RNA polymerase II transcription subunit 14 [Zootermopsis nevadensis]
	0.0191788	0.009973	2.7028	up	Maternal protein pumilio [Zootermopsis nevadensis]
	0.0191788	0.009973	2.7028	up	synaptic ras gtpase activating protein syngap [Hymenolepis microstoma]
	0.0191788	0.009973	2.7028	up	hypothetical protein L798_11233 [Zootermopsis nevadensis]
	0.0191788	0.009973	2.7028	up	--
	0.0191788	0.009973	2.7028	up	--
	0.0191788	0.009973	2.7028	up	hypothetical protein Phum_PHUM521410 [Pediculus humanus corporis]
	0.0191788	0.009973	2.7028	up	hypothetical protein RFI_22871 [Reticulomyxa filosa]
	0.0191788	0.009973	2.7028	up	predicted protein [Nematostella vectensis]
	0.0191788	0.009973	2.7028	up	PREDICTED: RNA-directed DNA polymerase from mobile element jockey-like [Diaphorina citri]
	0.0191788	0.009973	2.7028	up	PREDICTED: tRNA-dihydrouridine synthase 3-like [Amphimedon queenslandica]
	0.0191788	0.009973	2.7028	up	--
	0.0191788	0.009973	2.7028	up	Cytochrome b reductase 1, related [Eimeria praecox]
	0.0191788	0.009973	2.7028	up	--
	0.0191788	0.009973	2.7028	up	UNKNOWN [Stylonychia lemnae]
	0.0191788	0.009973	2.7028	up	AMP-dependent synthetase and ligase domain-containing protein [Dictyostelium discoideum AX4]
	0.0191788	0.009973	2.7028	up	PREDICTED: LOW QUALITY PROTEIN: dynein heavy chain 5, axonemal [Diaphorina citri]
	0.0191788	0.009973	2.7028	up	PREDICTED: uncharacterized protein LOC103507979 [Diaphorina citri]
	0.0191788	0.009973	2.7028	up	hypothetical protein TcasGA2_TC013747 [Tribolium castaneum]
	0.0191788	0.009973	2.7028	up	Glycerophosphoryl diester phosphodiesterase family protein [Tetrahymena thermophila]
	0.0191788	0.009973	2.7028	up	hypothetical protein CAPTEDRAFT_149447 [Capitella teleta]
	0.0191788	0.009973	2.7028	up	hypothetical protein PTSG_07121 [Salpingoeca rosetta]
	0.0191788	0.009973	2.7028	up	hypothetical protein BRAFLDRAFT_113674 [Branchiostoma floridae]
	0.0191788	0.009973	2.7028	up	fructose-bisphosphate aldolase [Gregarina niphandrodes]
	0.0191788	0.009973	2.7028	up	eukaryotic translation initiation factor 3 [Capsaspora owczarzaki ATCC 30864]
	0.0191788	0.009973	2.7028	up	fructose-bisphosphate aldolase [Gregarina niphandrodes]
	0.0191788	0.009973	2.7028	up	copper-transporting ATPase [Capsaspora owczarzaki ATCC 30864]
	0.0191788	0.009973	2.7028	up	Transcription factor BCFI [Thelohanellus kitauei]
	0.0191788	0.009973	2.7028	up	ankyrin repeat-containing protein [Dictyostelium fasciculatum]
	0.0191788	0.009973	2.7028	up	astacin, partial [Trichuris suis]
	0.0191788	0.009973	2.7028	up	glucan 1,3-beta-glucosidase [Capsaspora owczarzaki ATCC 30864]
	0.0191788	0.009973	2.7028	up	P-type ATPase [Polysphondylium pallidum PN500]
	0.0191788	0.009973	2.7028	up	ribosomal RNA assembly protein mis3 [Capsaspora owczarzaki ATCC 30864]
	0.0191788	0.009973	2.7028	up	PREDICTED: T-complex protein 1 subunit eta-like [Strongylocentrotus purpuratus]
	0.0191788	0.009973	2.7028	up	PREDICTED: actin-related protein 2-B-like [Amphimedon queenslandica]
	0.0191788	0.009973	2.7028	up	conserved hypothetical protein [Perkinsus marinus ATCC 50983]
	0.0191788	0.009973	2.7028	up	serine/threonine-protein kinase ppk14 [Capsaspora owczarzaki ATCC 30864]
	0.0191788	0.009973	2.7028	up	hypothetical protein CAOG_07845 [Capsaspora owczarzaki ATCC 30864]
	0.0191788	0.009973	2.7028	up	31 kDa antigen [Plasmodium berghei]
	0.0191788	0.009973	2.7028	up	3beta-hydroxysteroid dehydrogenase [Polysphondylium pallidum PN500]
	0.0191788	0.009973	2.7028	up	ubiquitin, partial [Bemisia tabaci]
	0.0191788	0.009973	2.7028	up	hypothetical protein SAMD00019534_012290 [Acytostelium subglobosum LB1]
	0.0191788	0.009973	2.7028	up	Vesicle-fusing ATPase 1, partial [Stegodyphus mimosarum]
	0.0191788	0.009973	2.7028	up	hypothetical protein SAMD00019534_014680 [Acytostelium subglobosum LB1]
	0.0191788	0.009973	2.7028	up	putative choline/ethanolamine kinase [Danaus plexippus]
	0.0191788	0.009973	2.7028	up	RasGEF domain containing protein [Acanthamoeba castellanii str. Neff]
	0.0191788	0.009973	2.7028	up	PREDICTED: nuclear pore complex protein Nup214 [Acromyrmex echinatior]
	0.0191788	0.009973	2.7028	up	hypothetical protein H696_00510 [Fonticula alba]
	0.0191788	0.009973	2.7028	up	Proteasome subunit alpha type-1 [Caligus rogercresseyi]
	0.0191788	0.009973	2.7028	up	aldolase class-1 protein [Apostichopus japonicus]
	0.0191788	0.009973	2.7028	up	hypothetical protein RFI_26798 [Reticulomyxa filosa]
	0.0191788	0.009973	2.7028	up	--
	0.0191788	0.009973	2.7028	up	PREDICTED: ubiquitin-conjugating enzyme E2 J1-like [Apis mellifera]
	0.0191788	0.009973	2.7028	up	predicted protein [Nematostella vectensis]
	0.0191788	0.009973	2.7028	up	PREDICTED: pre-mRNA-splicing factor ATP-dependent RNA helicase PRP16 [Tribolium castaneum]
	0.0191788	0.009973	2.7028	up	hypothetical protein LOTGIDRAFT_218121 [Lottia gigantea]
	0.0191788	0.009973	2.7028	up	hypothetical protein CAOG_00295 [Capsaspora owczarzaki ATCC 30864]
	0.0191788	0.009973	2.7028	up	PREDICTED: protein arginine N-methyltransferase 1-like [Ciona intestinalis]
	0.0191788	0.009973	2.7028	up	myblike DNA-binding domain, SHAQKYF class subfamily protein [Acanthamoeba castellanii str. Neff]
	0.0191788	0.009973	2.7028	up	hypothetical protein LOTGIDRAFT_130753, partial [Lottia gigantea]
	0.0191788	0.009973	2.7028	up	BPG-independent PGAM and Metalloenzyme domain containing protein [Haemonchus contortus]
	0.0191788	0.009973	2.7028	up	PREDICTED: argininosuccinate synthase [Tribolium castaneum]
	0.0191788	0.009973	2.7028	up	choline dehydrogenase [Capsaspora owczarzaki ATCC 30864]
	0.0191788	0.009973	2.7028	up	AGAP002106-PA [Anopheles gambiae str. PEST]
	0.0191788	0.009973	2.7028	up	anion transporter, putative [Acanthamoeba castellanii str. Neff]
	0.0191788	0.009973	2.7028	up	GA26948 [Drosophila pseudoobscura pseudoobscura]
	0.0191788	0.009973	2.7028	up	calmodulin, partial [Ostrea edulis]
	0.0191788	0.009973	2.7028	up	--
	0.0191788	0.009973	2.7028	up	phsophatase-2a [Capsaspora owczarzaki ATCC 30864]
	0.0191788	0.009973	2.7028	up	Elongation factor, putative [Perkinsus marinus ATCC 50983]
	0.0191788	0.009973	2.7028	up	ras GTPase-activating-like protein IQGAP1 [Capsaspora owczarzaki ATCC 30864]
	0.0191788	0.009973	2.7028	up	pre-mRNA cleavage complex subunit [Polysphondylium pallidum PN500]
	0.0191788	0.009973	2.7028	up	betaine-aldehyde dehydrogenase [Stylonychia lemnae]
	0.0191788	0.009973	2.7028	up	ADP/ATP translocase [Latrodectus hesperus]
	0.0191788	0.009973	2.7028	up	PREDICTED: NADH dehydrogenase [ubiquinone] 1 alpha subcomplex subunit 5-like [Amphimedon queenslandica]
	0.0191788	0.009973	2.7028	up	actin, partial [Corythalia cf. valida JXZ-2013]
	0.0191788	0.009973	2.7028	up	60S ribosomal-like protein [Pectinaria gouldii]
lst-miR-n60-3p	0.0139459	0.006787	2.82833	up	Putative tyrosine-protein kinase Wsck [Zootermopsis nevadensis]
	0.0139459	0.006787	2.82833	up	myosin 2 light chain [Triatoma infestans]
	0.0139459	0.006787	2.82833	up	polyubiquitin-like protein [Schistosoma japonicum]
	0.0139459	0.006787	2.82833	up	threonine aspartase, putative [Pediculus humanus corporis]
lst-miR-n61-5p	0.00175962	0.00061	3.41329	up	PiggyBac transposable element-derived protein 4, partial [Stegodyphus mimosarum]
	0.00175962	0.00061	3.41329	up	hypothetical protein [Phragmatopoma lapidosa]
	0.00175962	0.00061	3.41329	up	--
	0.00175962	0.00061	3.41329	up	fatty acid desaturase, putative [Pediculus humanus corporis]
	0.00175962	0.00061	3.41329	up	AGAP010024-PA [Anopheles gambiae str. PEST]
	0.00175962	0.00061	3.41329	up	predicted protein [Nematostella vectensis]
	0.00175962	0.00061	3.41329	up	conserved hypothetical protein [Pediculus humanus corporis]
	0.00175962	0.00061	3.41329	up	hypothetical protein AND_001751 [Anopheles darlingi]
	0.00175962	0.00061	3.41329	up	--
	0.00175962	0.00061	3.41329	up	nicotinic acetylcholine receptor beta 1 subunit [Nilaparvata lugens]
	0.00175962	0.00061	3.41329	up	PREDICTED: uncharacterized protein LOC103513036, partial [Diaphorina citri]
	0.00175962	0.00061	3.41329	up	PREDICTED: phosphate carrier protein, mitochondrial [Ciona intestinalis]
	0.00175962	0.00061	3.41329	up	connexin-related protein [Anopheles culicifacies]
lst-miR-n3-3p	3.97059e-05	9e-06	4.05072	up	Cold shock domain-containing protein E1 [Zootermopsis nevadensis]
	3.97059e-05	9e-06	4.05072	up	cytochrome P450 CYP314A1, partial [Laodelphax striatella]
	3.97059e-05	9e-06	4.05072	up	3methyl-2-oxobutanoate hydroxymethyltransferase [Acanthamoeba castellanii str. Neff]
	3.97059e-05	9e-06	4.05072	up	RING zinc finger-containing protein [Dictyostelium fasciculatum]
	3.97059e-05	9e-06	4.05072	up	hypothetical protein CAOG_03906 [Capsaspora owczarzaki ATCC 30864]
	3.97059e-05	9e-06	4.05072	up	Teneurin-3 [Zootermopsis nevadensis]
	3.97059e-05	9e-06	4.05072	up	--
	3.97059e-05	9e-06	4.05072	up	Blood vessel epicardial substance, partial [Zootermopsis nevadensis]
	3.97059e-05	9e-06	4.05072	up	--
	3.97059e-05	9e-06	4.05072	up	--
	3.97059e-05	9e-06	4.05072	up	--
	3.97059e-05	9e-06	4.05072	up	aspartic protease [Caenorhabditis elegans]
	3.97059e-05	9e-06	4.05072	up	hypothetical protein L798_11121 [Zootermopsis nevadensis]
	3.97059e-05	9e-06	4.05072	up	Intron-binding protein aquarius, partial [Zootermopsis nevadensis]
	3.97059e-05	9e-06	4.05072	up	PREDICTED: acetyl-CoA carboxylase isoform X1 [Acyrthosiphon pisum]
	3.97059e-05	9e-06	4.05072	up	neuropeptide GPCR A25 [Nilaparvata lugens]
	3.97059e-05	9e-06	4.05072	up	E3 ubiquitin-protein ligase Bre1 [Zootermopsis nevadensis]
	3.97059e-05	9e-06	4.05072	up	PREDICTED: nucleolar protein 9 [Harpegnathos saltator]
	3.97059e-05	9e-06	4.05072	up	ATP-dependent RNA helicase DHX8 [Zootermopsis nevadensis]
	3.97059e-05	9e-06	4.05072	up	Protein ERGIC-53 [Zootermopsis nevadensis]
	3.97059e-05	9e-06	4.05072	up	Glucose-6-phosphate 1-dehydrogenase [Zootermopsis nevadensis]
	3.97059e-05	9e-06	4.05072	up	hypothetical protein YQE_12448, partial [Dendroctonus ponderosae]
	3.97059e-05	9e-06	4.05072	up	Inositol-tetrakisphosphate 1-kinase [Zootermopsis nevadensis]
	3.97059e-05	9e-06	4.05072	up	PREDICTED: agrin-like [Tribolium castaneum]
	3.97059e-05	9e-06	4.05072	up	Aldo-keto reductase family 1 member B10 [Zootermopsis nevadensis]
	3.97059e-05	9e-06	4.05072	up	PREDICTED: probable tyrosine--tRNA ligase, mitochondrial-like [Bombyx mori]
	3.97059e-05	9e-06	4.05072	up	GL12416 [Drosophila persimilis]
	3.97059e-05	9e-06	4.05072	up	PREDICTED: growth arrest-specific protein 1-like [Tribolium castaneum]
	3.97059e-05	9e-06	4.05072	up	PREDICTED: LOW QUALITY PROTEIN: midasin-like [Nasonia vitripennis]
	3.97059e-05	9e-06	4.05072	up	Nucleoporin p58/p45 [Zootermopsis nevadensis]
	3.97059e-05	9e-06	4.05072	up	PREDICTED: IQ motif and SEC7 domain-containing protein 1 isoform X3 [Tribolium castaneum]
	3.97059e-05	9e-06	4.05072	up	PREDICTED: synaptic vesicle glycoprotein 2B-like isoform X4 [Tribolium castaneum]
	3.97059e-05	9e-06	4.05072	up	Protein arginine N-methyltransferase 5 [Zootermopsis nevadensis]
	3.97059e-05	9e-06	4.05072	up	unknown [Dendroctonus ponderosae]
	3.97059e-05	9e-06	4.05072	up	hypothetical protein H696_04046 [Fonticula alba]
	3.97059e-05	9e-06	4.05072	up	--
	3.97059e-05	9e-06	4.05072	up	--
	3.97059e-05	9e-06	4.05072	up	--
	3.97059e-05	9e-06	4.05072	up	Tripartite motif-containing protein 3 [Zootermopsis nevadensis]
	3.97059e-05	9e-06	4.05072	up	annexin [Artemia franciscana]
	3.97059e-05	9e-06	4.05072	up	Potassium voltage-gated channel protein Shaw [Zootermopsis nevadensis]
	3.97059e-05	9e-06	4.05072	up	Protein SMG8 [Zootermopsis nevadensis]
	3.97059e-05	9e-06	4.05072	up	--
	3.97059e-05	9e-06	4.05072	up	PREDICTED: transmembrane and TPR repeat-containing protein CG4341-like [Tribolium castaneum]
	3.97059e-05	9e-06	4.05072	up	--
	3.97059e-05	9e-06	4.05072	up	PREDICTED: uncharacterized protein LOC658883 [Tribolium castaneum]
	3.97059e-05	9e-06	4.05072	up	surface antigen protein [Angomonas deanei]
	3.97059e-05	9e-06	4.05072	up	hypothetical protein CAOG_03793 [Capsaspora owczarzaki ATCC 30864]
	3.97059e-05	9e-06	4.05072	up	--
	3.97059e-05	9e-06	4.05072	up	--
	3.97059e-05	9e-06	4.05072	up	--
	3.97059e-05	9e-06	4.05072	up	hypothetical protein LOTGIDRAFT_142052 [Lottia gigantea]
	3.97059e-05	9e-06	4.05072	up	--
	3.97059e-05	9e-06	4.05072	up	expressed hypothetical protein [Trichoplax adhaerens]
	3.97059e-05	9e-06	4.05072	up	PREDICTED: leupaxin-like [Microplitis demolitor]
	3.97059e-05	9e-06	4.05072	up	taurine catabolism dioxygenase TauD [Salpingoeca rosetta]
	3.97059e-05	9e-06	4.05072	up	--
	3.97059e-05	9e-06	4.05072	up	Vacuolar protein sorting-associated protein 41-like protein [Zootermopsis nevadensis]
	3.97059e-05	9e-06	4.05072	up	Lian-Aa1 retrotransposon protein [Aedes aegypti]
	3.97059e-05	9e-06	4.05072	up	PREDICTED: hypothetical protein LOC100647764 [Bombus terrestris]
	3.97059e-05	9e-06	4.05072	up	unknown [Dendroctonus ponderosae]
	3.97059e-05	9e-06	4.05072	up	acyl-coa dehydrogenase, putative [Perkinsus marinus ATCC 50983]
	3.97059e-05	9e-06	4.05072	up	predicted protein [Naegleria gruberi]
	3.97059e-05	9e-06	4.05072	up	PREDICTED: polyhomeotic-like protein 1 [Tribolium castaneum]
	3.97059e-05	9e-06	4.05072	up	Tectonin beta-propeller repeat-containing protein [Zootermopsis nevadensis]
	3.97059e-05	9e-06	4.05072	up	--
	3.97059e-05	9e-06	4.05072	up	PREDICTED: transmembrane 9 superfamily member 3 [Megachile rotundata]
	3.97059e-05	9e-06	4.05072	up	PREDICTED: epithelial discoidin domain-containing receptor 1-like [Tribolium castaneum]
	3.97059e-05	9e-06	4.05072	up	PREDICTED: rho GTPase-activating protein 100F isoform X6 [Acromyrmex echinatior]
	3.97059e-05	9e-06	4.05072	up	hypothetical protein H696_00082 [Fonticula alba]
	3.97059e-05	9e-06	4.05072	up	--
	3.97059e-05	9e-06	4.05072	up	hypothetical protein [Monosiga brevicollis MX1]
	3.97059e-05	9e-06	4.05072	up	AGAP004266-PA [Anopheles gambiae str. PEST]
	3.97059e-05	9e-06	4.05072	up	General transcription factor 3C polypeptide 3 [Zootermopsis nevadensis]
	3.97059e-05	9e-06	4.05072	up	--
	3.97059e-05	9e-06	4.05072	up	--
	3.97059e-05	9e-06	4.05072	up	Nuclear pore complex protein Nup214 [Zootermopsis nevadensis]
	3.97059e-05	9e-06	4.05072	up	PREDICTED: nephrin isoform X2 [Tribolium castaneum]
	3.97059e-05	9e-06	4.05072	up	Dehydrogenase/reductase SDR family protein 7-like [Zootermopsis nevadensis]
	3.97059e-05	9e-06	4.05072	up	PREDICTED: major facilitator superfamily domain-containing protein 10-like isoform X1 [Aplysia californica]
	3.97059e-05	9e-06	4.05072	up	predicted protein [Naegleria gruberi]
	3.97059e-05	9e-06	4.05072	up	PREDICTED: dual specificity protein phosphatase CDC14A isoform 1 [Strongylocentrotus purpuratus]
	3.97059e-05	9e-06	4.05072	up	PREDICTED: transcription factor RFX3 [Diaphorina citri]
	3.97059e-05	9e-06	4.05072	up	PREDICTED: zinc finger and BTB domain-containing protein 24-like [Strongylocentrotus purpuratus]
	3.97059e-05	9e-06	4.05072	up	--
	3.97059e-05	9e-06	4.05072	up	predicted protein [Nematostella vectensis]
	3.97059e-05	9e-06	4.05072	up	hypothetical protein H696_01800 [Fonticula alba]
	3.97059e-05	9e-06	4.05072	up	Integrator complex subunit 9 [Zootermopsis nevadensis]
	3.97059e-05	9e-06	4.05072	up	CDP-diacylglycerol/serine O-phosphatidyltransferase [Reticulomyxa filosa]
	3.97059e-05	9e-06	4.05072	up	PREDICTED: COP9 signalosome complex subunit 2-like isoform 1 [Strongylocentrotus purpuratus]
	3.97059e-05	9e-06	4.05072	up	H(+)/Cl(-) exchange transporter 3 [Zootermopsis nevadensis]
	3.97059e-05	9e-06	4.05072	up	hypothetical protein BRAFLDRAFT_86625 [Branchiostoma floridae]
	3.97059e-05	9e-06	4.05072	up	Sorting and assembly machinery component 50-like protein [Zootermopsis nevadensis]
	3.97059e-05	9e-06	4.05072	up	PREDICTED: BSD domain-containing protein 1-like [Ciona intestinalis]
	3.97059e-05	9e-06	4.05072	up	putative 2-oxoglutarate dehydrogenase E1 component DHKTD1-like protein, mitochondrial [Zootermopsis nevadensis]
	3.97059e-05	9e-06	4.05072	up	PREDICTED: proton myo-inositol cotransporter-like [Aplysia californica]
	3.97059e-05	9e-06	4.05072	up	--
	3.97059e-05	9e-06	4.05072	up	--
	3.97059e-05	9e-06	4.05072	up	PREDICTED: ankyrin repeat and KH domain-containing protein 1 [Harpegnathos saltator]
	3.97059e-05	9e-06	4.05072	up	pectin methylesterase [Sitophilus oryzae]
	3.97059e-05	9e-06	4.05072	up	zinc-binding oxidoreductase CipB, variant [Salpingoeca rosetta]
	3.97059e-05	9e-06	4.05072	up	Late secretory pathway protein AVL9-like protein [Zootermopsis nevadensis]
	3.97059e-05	9e-06	4.05072	up	Inscuteable-like protein [Zootermopsis nevadensis]
	3.97059e-05	9e-06	4.05072	up	--
	3.97059e-05	9e-06	4.05072	up	--
	3.97059e-05	9e-06	4.05072	up	PREDICTED: protein pygopus isoform X3 [Tribolium castaneum]
	3.97059e-05	9e-06	4.05072	up	--
	3.97059e-05	9e-06	4.05072	up	PREDICTED: notchless protein homolog 1-like [Diaphorina citri]
	3.97059e-05	9e-06	4.05072	up	Mitochondrial import inner membrane translocase subunit Tim23 [Zootermopsis nevadensis]
	3.97059e-05	9e-06	4.05072	up	Putative initiator tRNA phosphoribosyl-transferase [Polysphondylium pallidum PN500]
	3.97059e-05	9e-06	4.05072	up	PREDICTED: rap guanine nucleotide exchange factor 2 isoform X1 [Acyrthosiphon pisum]
	3.97059e-05	9e-06	4.05072	up	--
	3.97059e-05	9e-06	4.05072	up	--
	3.97059e-05	9e-06	4.05072	up	hypothetical protein H696_01093 [Fonticula alba]
	3.97059e-05	9e-06	4.05072	up	--
	3.97059e-05	9e-06	4.05072	up	--
	3.97059e-05	9e-06	4.05072	up	Protein split ends, partial [Zootermopsis nevadensis]
	3.97059e-05	9e-06	4.05072	up	Kinase D-interacting substrate of 220 kDa, partial [Zootermopsis nevadensis]
	3.97059e-05	9e-06	4.05072	up	Poly(ADP-ribose) glycohydrolase [Zootermopsis nevadensis]
	3.97059e-05	9e-06	4.05072	up	hypothetical protein YQE_05242, partial [Dendroctonus ponderosae]
	3.97059e-05	9e-06	4.05072	up	--
	3.97059e-05	9e-06	4.05072	up	hypothetical protein L798_07280 [Zootermopsis nevadensis]
	3.97059e-05	9e-06	4.05072	up	--
	3.97059e-05	9e-06	4.05072	up	--
	3.97059e-05	9e-06	4.05072	up	light-harvesting complex protein LHCG12 [Bigelowiella natans]
	3.97059e-05	9e-06	4.05072	up	PREDICTED: mucin-12 [Solenopsis invicta]
	3.97059e-05	9e-06	4.05072	up	--
	3.97059e-05	9e-06	4.05072	up	PREDICTED: uncharacterized protein YGR266W-like, partial [Saccoglossus kowalevskii]
	3.97059e-05	9e-06	4.05072	up	--
	3.97059e-05	9e-06	4.05072	up	hypothetical protein SAMD00019534_052780 [Acytostelium subglobosum LB1]
	3.97059e-05	9e-06	4.05072	up	Protein split ends, partial [Zootermopsis nevadensis]
	3.97059e-05	9e-06	4.05072	up	PREDICTED: organic cation transporter 1-like [Bombus terrestris]
	3.97059e-05	9e-06	4.05072	up	PREDICTED: sodium-dependent phosphate transport protein 2B-like [Saccoglossus kowalevskii]
	3.97059e-05	9e-06	4.05072	up	PREDICTED: protein slit isoform X3 [Tribolium castaneum]
	3.97059e-05	9e-06	4.05072	up	cation efflux family superfamily protein [Acanthamoeba castellanii str. Neff]
	3.97059e-05	9e-06	4.05072	up	hypothetical protein PTSG_10361 [Salpingoeca rosetta]
	3.97059e-05	9e-06	4.05072	up	--
	3.97059e-05	9e-06	4.05072	up	Solute carrier family 2, facilitated glucose transporter member 3 [Zootermopsis nevadensis]
	3.97059e-05	9e-06	4.05072	up	RING finger protein 170 [Zootermopsis nevadensis]
	3.97059e-05	9e-06	4.05072	up	PREDICTED: uncharacterized protein LOC100119481 [Nasonia vitripennis]
	3.97059e-05	9e-06	4.05072	up	hypothetical protein TcasGA2_TC002315 [Tribolium castaneum]
	3.97059e-05	9e-06	4.05072	up	--
	3.97059e-05	9e-06	4.05072	up	PREDICTED: dystrophin, isoforms A/C/F/G/H-like isoform 1 [Bombus impatiens]
	3.97059e-05	9e-06	4.05072	up	--
	3.97059e-05	9e-06	4.05072	up	PREDICTED: 60S acidic ribosomal protein P1-like [Saccoglossus kowalevskii]
	3.97059e-05	9e-06	4.05072	up	Protein of unknown function DUF544 domain containing protein [Haemonchus contortus]
	3.97059e-05	9e-06	4.05072	up	--
	3.97059e-05	9e-06	4.05072	up	PREDICTED: putative type-1 restriction enzyme MjaXP R protein-like [Ceratitis capitata]
	3.97059e-05	9e-06	4.05072	up	Lebercilin-like protein [Zootermopsis nevadensis]
	3.97059e-05	9e-06	4.05072	up	Transmembrane and coiled-coil domain-containing protein 4 [Zootermopsis nevadensis]
	3.97059e-05	9e-06	4.05072	up	PREDICTED: protein KRI1 homolog [Tribolium castaneum]
	3.97059e-05	9e-06	4.05072	up	--
	3.97059e-05	9e-06	4.05072	up	PREDICTED: histone deacetylase 6 [Nasonia vitripennis]
	3.97059e-05	9e-06	4.05072	up	--
	3.97059e-05	9e-06	4.05072	up	xap-5 protein-related [Schistosoma mansoni]
	3.97059e-05	9e-06	4.05072	up	--
	3.97059e-05	9e-06	4.05072	up	--
	3.97059e-05	9e-06	4.05072	up	GK15001 [Drosophila willistoni]
	3.97059e-05	9e-06	4.05072	up	Transmembrane 9 superfamily member 4 [Zootermopsis nevadensis]
	3.97059e-05	9e-06	4.05072	up	ATPase [Salpingoeca rosetta]
	3.97059e-05	9e-06	4.05072	up	--
	3.97059e-05	9e-06	4.05072	up	Retrotransposon nucleocapsid protein, related [Eimeria maxima]
	3.97059e-05	9e-06	4.05072	up	hypothetical protein TRIADDRAFT_29334 [Trichoplax adhaerens]
	3.97059e-05	9e-06	4.05072	up	--
	3.97059e-05	9e-06	4.05072	up	AGAP008472-PA [Anopheles gambiae str. PEST]
	3.97059e-05	9e-06	4.05072	up	Neural cell adhesion molecule 2, partial [Zootermopsis nevadensis]
	3.97059e-05	9e-06	4.05072	up	PREDICTED: PDZ domain-containing protein 6-like [Bombus impatiens]
	3.97059e-05	9e-06	4.05072	up	hypothetical protein DDB_G0291842 [Dictyostelium discoideum AX4]
	3.97059e-05	9e-06	4.05072	up	--
	3.97059e-05	9e-06	4.05072	up	PREDICTED: LOW QUALITY PROTEIN: WD repeat and FYVE domain-containing protein 3-like [Apis florea]
	3.97059e-05	9e-06	4.05072	up	PREDICTED: maestro heat-like repeat-containing protein family member 1 [Tribolium castaneum]
	3.97059e-05	9e-06	4.05072	up	PREDICTED: kinesin-like protein KIF23-like [Megachile rotundata]
	3.97059e-05	9e-06	4.05072	up	--
	3.97059e-05	9e-06	4.05072	up	PREDICTED: uncharacterized protein LOC103580058 isoform X2 [Microplitis demolitor]
	3.97059e-05	9e-06	4.05072	up	PREDICTED: phosphatidylinositol-binding clathrin assembly protein LAP isoform X13 [Apis mellifera]
	3.97059e-05	9e-06	4.05072	up	--
	3.97059e-05	9e-06	4.05072	up	chlorophyll a/b binding protein CP29 [Gymnochlora stellata]
	3.97059e-05	9e-06	4.05072	up	ciliary dynein heavy chain, putative [Pediculus humanus corporis]
	3.97059e-05	9e-06	4.05072	up	hypothetical protein L798_07600 [Zootermopsis nevadensis]
	3.97059e-05	9e-06	4.05072	up	hypothetical protein EAG_00868 [Camponotus floridanus]
	3.97059e-05	9e-06	4.05072	up	--
	3.97059e-05	9e-06	4.05072	up	hypothetical protein EAI_03520 [Harpegnathos saltator]
	3.97059e-05	9e-06	4.05072	up	hypothetical protein CAPTEDRAFT_153456 [Capitella teleta]
	3.97059e-05	9e-06	4.05072	up	PREDICTED: protein diaphanous isoform X1 [Solenopsis invicta]
	3.97059e-05	9e-06	4.05072	up	Linear gramicidin synthase subunit D [Thelohanellus kitauei]
	3.97059e-05	9e-06	4.05072	up	PREDICTED: dnaJ homolog subfamily C member 11 [Acromyrmex echinatior]
	3.97059e-05	9e-06	4.05072	up	Stereocilin [Zootermopsis nevadensis]
	3.97059e-05	9e-06	4.05072	up	hypothetical protein L798_04073, partial [Zootermopsis nevadensis]
	3.97059e-05	9e-06	4.05072	up	--
	3.97059e-05	9e-06	4.05072	up	31 kDa antigen [Plasmodium berghei]
	3.97059e-05	9e-06	4.05072	up	unnamed protein product [Oikopleura dioica]
	3.97059e-05	9e-06	4.05072	up	--
	3.97059e-05	9e-06	4.05072	up	--
	3.97059e-05	9e-06	4.05072	up	PREDICTED: actin cytoskeleton-regulatory complex protein PAN1-like [Solenopsis invicta]
	3.97059e-05	9e-06	4.05072	up	chlorophyll a/b binding protein CP29 [Gymnochlora stellata]
	3.97059e-05	9e-06	4.05072	up	aminoadipate-semialdehyde dehydrogenase [Capsaspora owczarzaki ATCC 30864]
	3.97059e-05	9e-06	4.05072	up	Transmembrane emp24 domain-containing protein 3 [Zootermopsis nevadensis]
	3.97059e-05	9e-06	4.05072	up	--
	3.97059e-05	9e-06	4.05072	up	--
	3.97059e-05	9e-06	4.05072	up	WDR1 protein [Capsaspora owczarzaki ATCC 30864]
	3.97059e-05	9e-06	4.05072	up	Putative ammonium transporter 1 [Zootermopsis nevadensis]
	3.97059e-05	9e-06	4.05072	up	PREDICTED: uncharacterized protein LOC101234522 [Hydra vulgaris]
	3.97059e-05	9e-06	4.05072	up	urea amidolyase [Planococcus citri]
	3.97059e-05	9e-06	4.05072	up	--
	3.97059e-05	9e-06	4.05072	up	hypothetical protein TcasGA2_TC001551 [Tribolium castaneum]
	3.97059e-05	9e-06	4.05072	up	hypothetical protein CAPTEDRAFT_174345 [Capitella teleta]
	3.97059e-05	9e-06	4.05072	up	G-protein coupled receptor 64 [Crassostrea gigas]
	3.97059e-05	9e-06	4.05072	up	--
	3.97059e-05	9e-06	4.05072	up	hypothetical protein TRIADDRAFT_25485 [Trichoplax adhaerens]
	3.97059e-05	9e-06	4.05072	up	PREDICTED: origin recognition complex subunit 2-like [Bombyx mori]
	3.97059e-05	9e-06	4.05072	up	hypothetical protein DICPUDRAFT_79738 [Dictyostelium purpureum]
	3.97059e-05	9e-06	4.05072	up	transmembrane trafficking protein precursor [Bombyx mori]
	3.97059e-05	9e-06	4.05072	up	calpain-7 [Capsaspora owczarzaki ATCC 30864]
	3.97059e-05	9e-06	4.05072	up	--
	3.97059e-05	9e-06	4.05072	up	putative ATPase type 13A3 [Danaus plexippus]
	3.97059e-05	9e-06	4.05072	up	thiogalactoside transacetylase [Trichomonas vaginalis G3]
	3.97059e-05	9e-06	4.05072	up	--
	3.97059e-05	9e-06	4.05072	up	--
	3.97059e-05	9e-06	4.05072	up	GRAM domain-containing protein 1B [Crassostrea gigas]
	3.97059e-05	9e-06	4.05072	up	PREDICTED: homeobox protein SIX6 [Diaphorina citri]
	3.97059e-05	9e-06	4.05072	up	hypothetical protein H696_02304 [Fonticula alba]
	3.97059e-05	9e-06	4.05072	up	hypothetical protein DICPUDRAFT_58958 [Dictyostelium purpureum]
	3.97059e-05	9e-06	4.05072	up	tRNA pseudouridine38-40 synthase, variant [Fonticula alba]
	3.97059e-05	9e-06	4.05072	up	hypothetical protein [Monosiga brevicollis MX1]
	3.97059e-05	9e-06	4.05072	up	AGAP000756-PB [Anopheles gambiae str. PEST]
	3.97059e-05	9e-06	4.05072	up	PREDICTED: hypothetical protein LOC100632362 [Amphimedon queenslandica]
	3.97059e-05	9e-06	4.05072	up	dihydro-6-hydroxymethylpterin pyrophosphokinase [Polysphondylium pallidum PN500]
	3.97059e-05	9e-06	4.05072	up	hypothetical protein SAMD00019534_013170 [Acytostelium subglobosum LB1]
	3.97059e-05	9e-06	4.05072	up	predicted protein [Nematostella vectensis]
	3.97059e-05	9e-06	4.05072	up	hypothetical protein T265_04789 [Opisthorchis viverrini]
	3.97059e-05	9e-06	4.05072	up	PREDICTED: histone H3.3 [Ciona intestinalis]
	3.97059e-05	9e-06	4.05072	up	unnamed protein product [Oikopleura dioica]
	3.97059e-05	9e-06	4.05072	up	SNF2 superfamily RAD5 protein [Capsaspora owczarzaki ATCC 30864]
	3.97059e-05	9e-06	4.05072	up	hypothetical protein BRAFLDRAFT_86731 [Branchiostoma floridae]
	3.97059e-05	9e-06	4.05072	up	vacuolar calcium ion transporter, putative [Perkinsus marinus ATCC 50983]
	3.97059e-05	9e-06	4.05072	up	PREDICTED: 60S ribosomal protein L8-like isoform X1 [Saccoglossus kowalevskii]
	3.97059e-05	9e-06	4.05072	up	PREDICTED: NADH-ubiquinone oxidoreductase 49 kDa subunit [Bactrocera dorsalis]
	3.97059e-05	9e-06	4.05072	up	hypothetical protein LOTGIDRAFT_110784 [Lottia gigantea]
	3.97059e-05	9e-06	4.05072	up	PREDICTED: midasin-like [Hydra vulgaris]
	3.97059e-05	9e-06	4.05072	up	hypothetical protein SAMD00019534_016100 [Acytostelium subglobosum LB1]
	3.97059e-05	9e-06	4.05072	up	predicted protein [Nematostella vectensis]
	3.97059e-05	9e-06	4.05072	up	ribosomal protein S10 [Crassostrea gigas]
	3.97059e-05	9e-06	4.05072	up	longevity assurance factor 1 [Culex quinquefasciatus]
	3.97059e-05	9e-06	4.05072	up	PREDICTED: 26S proteasome non-ATPase regulatory subunit 14-like isoform 1 [Strongylocentrotus purpuratus]
	3.97059e-05	9e-06	4.05072	up	hypothetical protein CAPTEDRAFT_200823 [Capitella teleta]
	3.97059e-05	9e-06	4.05072	up	hypothetical protein BRAFLDRAFT_160417 [Branchiostoma floridae]
	3.97059e-05	9e-06	4.05072	up	hypothetical protein BRAFLDRAFT_279825 [Branchiostoma floridae]
	3.97059e-05	9e-06	4.05072	up	cystathionine beta-lyase [Capsaspora owczarzaki ATCC 30864]
	3.97059e-05	9e-06	4.05072	up	PREDICTED: periodic tryptophan protein 2 homolog, partial [Strongylocentrotus purpuratus]
	3.97059e-05	9e-06	4.05072	up	hypothetical protein BRAFLDRAFT_285686 [Branchiostoma floridae]
	3.97059e-05	9e-06	4.05072	up	hypothetical protein BRAFLDRAFT_129974 [Branchiostoma floridae]
	3.97059e-05	9e-06	4.05072	up	hypothetical protein LOTGIDRAFT_153167 [Lottia gigantea]
	3.97059e-05	9e-06	4.05072	up	predicted protein [Naegleria gruberi]
	3.97059e-05	9e-06	4.05072	up	protein phosphatase 2 [Capsaspora owczarzaki ATCC 30864]
	3.97059e-05	9e-06	4.05072	up	hypothetical protein BRAFLDRAFT_215154 [Branchiostoma floridae]
	3.97059e-05	9e-06	4.05072	up	THO complex subunit, putative [Pediculus humanus corporis]
	3.97059e-05	9e-06	4.05072	up	tRNA(Met) cytidine acetyltransferase [Fonticula alba]
	3.97059e-05	9e-06	4.05072	up	unnamed protein product [Oikopleura dioica]
	3.97059e-05	9e-06	4.05072	up	1-acylglycerol-3-phosphate acyltransferase, putative [Entamoeba invadens IP1]
	3.97059e-05	9e-06	4.05072	up	transforming protein RhoA [Trichinella spiralis]
	3.97059e-05	9e-06	4.05072	up	PREDICTED: DNA replication licensing factor Mcm3 [Acromyrmex echinatior]
	3.97059e-05	9e-06	4.05072	up	PREDICTED: nucleoside diphosphate kinase-like [Ceratitis capitata]
	3.97059e-05	9e-06	4.05072	up	hypothetical protein LOTGIDRAFT_207699 [Lottia gigantea]
	3.97059e-05	9e-06	4.05072	up	--
	3.97059e-05	9e-06	4.05072	up	Phosphatidylinositol-specific phospholipase C, X domain containing protein [Trichomonas vaginalis G3]
	3.97059e-05	9e-06	4.05072	up	hypothetical protein TRIADDRAFT_18858 [Trichoplax adhaerens]
	3.97059e-05	9e-06	4.05072	up	hypothetical protein LOTGIDRAFT_138655 [Lottia gigantea]
	3.97059e-05	9e-06	4.05072	up	cullin C [Dictyostelium fasciculatum]
	3.97059e-05	9e-06	4.05072	up	ATP-binding cassette sub-family B member 10 [Capsaspora owczarzaki ATCC 30864]
	3.97059e-05	9e-06	4.05072	up	importin beta subunit [Acanthamoeba castellanii str. Neff]
	3.97059e-05	9e-06	4.05072	up	hypothetical protein BRAFLDRAFT_121141 [Branchiostoma floridae]
	3.97059e-05	9e-06	4.05072	up	AMP-dependent synthetase and ligase [Acanthamoeba castellanii str. Neff]
	3.97059e-05	9e-06	4.05072	up	transporter, major facilitator superfamily superfamily protein [Acanthamoeba castellanii str. Neff]
	3.97059e-05	9e-06	4.05072	up	hypothetical protein EMWEY_00014950 [Eimeria maxima]
	3.97059e-05	9e-06	4.05072	up	PREDICTED: pyruvate kinase PKM [Ciona intestinalis]
	3.97059e-05	9e-06	4.05072	up	--
	3.97059e-05	9e-06	4.05072	up	hypothetical protein TRIADDRAFT_32519 [Trichoplax adhaerens]
	3.97059e-05	9e-06	4.05072	up	splicing factor 3b subunit 1, putative [Acanthamoeba castellanii str. Neff]
	3.97059e-05	9e-06	4.05072	up	Pre-mRNA-splicing factor syf2 [Zootermopsis nevadensis]
	3.97059e-05	9e-06	4.05072	up	peroxisome biosynthesis protein [Capsaspora owczarzaki ATCC 30864]
	3.97059e-05	9e-06	4.05072	up	anthranilate synthase component I [Capsaspora owczarzaki ATCC 30864]
	3.97059e-05	9e-06	4.05072	up	pre-mRNA-splicing factor ATP-dependent RNA helicase [Capsaspora owczarzaki ATCC 30864]
	3.97059e-05	9e-06	4.05072	up	catalase isozyme 2 [Capsaspora owczarzaki ATCC 30864]
	3.97059e-05	9e-06	4.05072	up	hypothetical protein H696_01572 [Fonticula alba]
	3.97059e-05	9e-06	4.05072	up	hypothetical protein CAPTEDRAFT_195632 [Capitella teleta]
	3.97059e-05	9e-06	4.05072	up	Kidney mitochondrial carrier protein 1 [Zootermopsis nevadensis]
	3.97059e-05	9e-06	4.05072	up	predicted protein [Nematostella vectensis]
	3.97059e-05	9e-06	4.05072	up	hypothetical protein LOTGIDRAFT_186972 [Lottia gigantea]
	3.97059e-05	9e-06	4.05072	up	PREDICTED: tRNA (guanine(26)-N(2))-dimethyltransferase isoform 2 [Strongylocentrotus purpuratus]
	3.97059e-05	9e-06	4.05072	up	cytochrome P450 4g15 [Culex quinquefasciatus]
lst-miR-n70-3p	0	0	4.43321	up	PREDICTED: probable G-protein coupled receptor CG31760 [Tribolium castaneum]
	0	0	4.43321	up	--
	0	0	4.43321	up	hypothetical protein L798_00988 [Zootermopsis nevadensis]
	0	0	4.43321	up	BTB/POZ domain-containing protein 10 [Zootermopsis nevadensis]
	0	0	4.43321	up	hypothetical protein CAPTEDRAFT_160616 [Capitella teleta]
	0	0	4.43321	up	hypothetical protein CAPTEDRAFT_218722 [Capitella teleta]
	0	0	4.43321	up	endonuclease-reverse transcriptase HmRTE-e01 [Heliconius melpomene]
	0	0	4.43321	up	hypothetical protein L798_13724 [Zootermopsis nevadensis]
	0	0	4.43321	up	hypothetical protein EAG_02128 [Camponotus floridanus]
	0	0	4.43321	up	animal hem peroxidase [Oesophagostomum dentatum]
lst-miR-n21-5p	0.0360774	0.022849	27.06	up	orcokinin [Nilaparvata lugens]
	0.0360774	0.022849	27.06	up	--
lst-miR-n23-3p	2.27273e-05	5e-06	29.06	up	mitochondrial manganese superoxide dismutase [Macrobrachium nipponense]
	2.27273e-05	5e-06	29.06	up	neuropeptide F [Nilaparvata lugens]
	2.27273e-05	5e-06	29.06	up	PREDICTED: cullin-associated NEDD8-dissociated protein 1-like isoform 2 [Bombus terrestris]
	2.27273e-05	5e-06	29.06	up	--
	2.27273e-05	5e-06	29.06	up	PREDICTED: putative metabolite transport protein NicT-like [Ceratitis capitata]
	2.27273e-05	5e-06	29.06	up	hypothetical protein TcasGA2_TC013521 [Tribolium castaneum]
	2.27273e-05	5e-06	29.06	up	--
	2.27273e-05	5e-06	29.06	up	PREDICTED: uncharacterized protein LOC101743554 [Bombyx mori]
	2.27273e-05	5e-06	29.06	up	--
	2.27273e-05	5e-06	29.06	up	--
	2.27273e-05	5e-06	29.06	up	PREDICTED: RNA-directed DNA polymerase from mobile element jockey-like, partial [Diaphorina citri]
	2.27273e-05	5e-06	29.06	up	Lachesin, partial [Zootermopsis nevadensis]
	2.27273e-05	5e-06	29.06	up	--
	2.27273e-05	5e-06	29.06	up	PREDICTED: uncharacterized protein LOC102676563 [Apis dorsata]
	2.27273e-05	5e-06	29.06	up	FLJ37770-like protein [Acromyrmex echinatior]
	2.27273e-05	5e-06	29.06	up	non-LTR retrotransposon R1Bmks ORF2 protein [Bombyx mori]
	2.27273e-05	5e-06	29.06	up	PREDICTED: probable GPI-anchored adhesin-like protein PGA55 [Acyrthosiphon pisum]
	2.27273e-05	5e-06	29.06	up	hypothetical protein DDB_G0272440 [Dictyostelium discoideum AX4]
	2.27273e-05	5e-06	29.06	up	sodium-dependent phosphate transporter [Riptortus pedestris]
	2.27273e-05	5e-06	29.06	up	sugar transporter 13 [Nilaparvata lugens]
	2.27273e-05	5e-06	29.06	up	PREDICTED: signal peptidase complex subunit 1-like [Saccoglossus kowalevskii]
	2.27273e-05	5e-06	29.06	up	cysteine synthase [Ascaris suum]
	2.27273e-05	5e-06	29.06	up	cytochrome c heme-lyase [Dictyostelium fasciculatum]
lst-miR-n67-5p	1.40625e-05	3e-06	29.1189	up	--
	1.40625e-05	3e-06	29.1189	up	Kelch-like protein 5 [Zootermopsis nevadensis]
	1.40625e-05	3e-06	29.1189	up	PREDICTED: histone deacetylase 2-like [Saccoglossus kowalevskii]
	1.40625e-05	3e-06	29.1189	up	unnamed protein product [Phytomonas sp. isolate Hart1]
